# Supplementary material for: ATAD2 controls chromatin-bound HIRA turnover
Source: PubMed Central journal article supplement (PMC8500222; doi:10.26508/lsa.202101151), 2021-09-27
Supplement: LSA-2021-01151_review_history.pdf [file LSA-2021-01151_review_history.pdf]

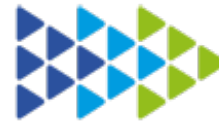

Life Science Alliance

# ATAD2 controls chromatin-bound HIRA turnover

Tao Wang, Daniel Perazza, Faycal Boussouar, Matteo Cattaneo, Alexandre Bougdour, Florent Chuffart, Sophie Barral, Alexandra Vargas, Ariadni Liakopoulou, Denis Puthier, Lisa Bargier, Yuichi Morozumi, Mahya Jamshidikia, Isabel Garcia-Saez, Carlo Petosa, Sophie Rousseaux, Andre Verdel, and Saadi Khochbin

DOI: <https://doi.org/10.26508/lsa.202101151>

Corresponding author(s): Saadi Khochbin, Inserm U1209 and Andre Verdel, CNRS, INSERM and University of Grenoble

---

## Review Timeline:

|                     |            |
|---------------------|------------|
| Submission Date:    | 2021-07-07 |
| Editorial Decision: | 2021-07-12 |
| Revision Received:  | 2021-08-26 |
| Editorial Decision: | 2021-09-13 |
| Revision Received:  | 2021-09-14 |
| Accepted:           | 2021-09-15 |

---

Scientific Editor: Novella Guidi

## Transaction Report:

(Note: With the exception of the correction of typographical or spelling errors that could be a source of ambiguity, letters and reports are not edited. The original formatting of letters and referee reports may not be reflected in this compilation.)

Please note that the manuscript was previously reviewed at another journal and the reports were taken into account in the decision-making process at Life Science Alliance. Since the original reviews are not subject to Life Science Alliance's transparent review process policy, the reports and author response cannot be published.

July 12, 2021

Re: Life Science Alliance manuscript #LSA-2021-01151-T

Saadi Khochbin  
Institut Albert Bonniot  
CNRS/INSERM, Université Grenoble-Alpes  
Domaine de la Merci  
La Tronche 38706 cedex  
France

Dear Dr. Khochbin,

Thank you for submitting your manuscript entitled "ATAD2 maintains the equilibrium between nucleosome assembly and disassembly" to Life Science Alliance. The manuscript was previously assessed by expert reviewers in other journal and based on their comments we would like to encourage further consideration of this manuscript at LSA pending the revisions.

We understand that such a revision might need to be re-reviewed, in which case, I will walk the Reviewers through our transfer process.

To upload the revised version of your manuscript, please log in to your account:  
<https://lsa.msubmit.net/cgi-bin/main.plex>

You will be guided to complete the submission of your revised manuscript and to fill in all necessary information. Please get in touch in case you do not know or remember your login name.

While you are revising your manuscript, please also attend to the below editorial points to help expedite the publication of your manuscript. Please direct any editorial questions to the journal office.

The typical timeframe for revisions is three months. Please note that papers are generally considered through only one revision cycle, so strong support from the referees on the revised version is needed for acceptance.

When submitting the revision, please include a letter addressing the reviewers' comments point by point.

Thank you for this interesting contribution to Life Science Alliance. We are looking forward to receiving your revised manuscript.

Sincerely,

Novella Guidi, PhD  
Scientific Editor  
Life Science Alliance

---

A. THESE ITEMS ARE REQUIRED FOR REVISIONS

- A letter addressing the reviewers' comments point by point.
- An editable version of the final text (.DOC or .DOCX) is needed for copyediting (no PDFs).
- High-resolution figure, supplementary figure and video files uploaded as individual files: See our detailed guidelines for preparing your production-ready images, <https://www.life-science-alliance.org/authors>
- Summary blurb (enter in submission system): A short text summarizing in a single sentence the study (max. 200 characters including spaces). This text is used in conjunction with the titles of papers, hence should be informative and complementary to the title and running title. It should describe the context and significance of the findings for a general readership; it should be written in the present tense and refer to the work in the third person. Author names should not be mentioned.

B. MANUSCRIPT ORGANIZATION AND FORMATTING:

Full guidelines are available on our Instructions for Authors page, <https://www.life-science-alliance.org/authors>

We encourage our authors to provide original source data, particularly uncropped/-processed electrophoretic blots and spreadsheets for the main figures of the manuscript. If you would like to add source data, we would welcome one PDF/Excel-file per figure for this information. These files will be linked online as supplementary "Source Data" files.

**\*\*\*IMPORTANT:** It is Life Science Alliance policy that if requested, original data images must be made available. Failure to provide original images upon request will result in unavoidable delays in publication. Please ensure that you have access to all original microscopy and blot data images before submitting your revision.**\*\*\***

---

September 13, 2021

RE: Life Science Alliance Manuscript #LSA-2021-01151-TR

Dr. Saadi Khochbin  
CNRS, INSERM and University of Grenoble  
Domaine de la Merci  
La Tronche 38706 cedex  
France

Dear Dr. Khochbin,

Thank you for submitting your revised manuscript entitled "ATAD2 controls chromatin-bound HIRA turnover". We would be happy to publish your paper in Life Science Alliance pending final revisions necessary to meet our formatting guidelines.

Along with points mentioned below, please tend to the following:

- please upload both your main and supplementary figures as single files
- please add ORCID ID for secondary corresponding) author-they should have received instructions on how to do so
- please add your main, supplementary figure, and table legends to the main manuscript text after the references section
- please revise call-outs in the manuscript text for Figures 2C (which is missing) and 3C
- please indicate the molecular weight alongside blots in figure 3A

If you are planning a press release on your work, please inform us immediately to allow informing our production team and scheduling a release date.

LSA now encourages authors to provide a 30-60 second video where the study is briefly explained. We will use these videos on social media to promote the published paper and the presenting author (for examples, see <https://twitter.com/LSAjournal>). Corresponding or first-authors are welcome to submit the video. Please submit only one video per manuscript. The video can be emailed to [contact@life-science-alliance.org](mailto:contact@life-science-alliance.org)

To upload the final version of your manuscript, please log in to your account:

<https://lsa.msubmit.net/cgi-bin/main.plex>

You will be guided to complete the submission of your revised manuscript and to fill in all necessary information. Please get in touch in case you do not know or remember your login name.

To avoid unnecessary delays in the acceptance and publication of your paper, please read the following information carefully.

A. FINAL FILES:

These items are required for acceptance.

-- An editable version of the final text (.DOC or .DOCX) is needed for copyediting (no PDFs).

-- High-resolution figure, supplementary figure and video files uploaded as individual files: See our detailed guidelines for preparing your production-ready images, <https://www.life-science-alliance.org/authors>

-- Summary blurb (enter in submission system): A short text summarizing in a single sentence the study (max. 200 characters including spaces). This text is used in conjunction with the titles of papers, hence should be informative and complementary to the title. It should describe the context and significance of the findings for a general readership; it should be written in the present tense and refer to the work in the third person. Author names should not be mentioned.

## B. MANUSCRIPT ORGANIZATION AND FORMATTING:

Full guidelines are available on our Instructions for Authors page, <https://www.life-science-alliance.org/authors>

We encourage our authors to provide original source data, particularly uncropped/-processed electrophoretic blots and spreadsheets for the main figures of the manuscript. If you would like to add source data, we would welcome one PDF/Excel-file per figure for this information. These files will be linked online as supplementary "Source Data" files.

**\*\*Submission of a paper that does not conform to Life Science Alliance guidelines will delay the acceptance of your manuscript.\*\***

**\*\*It is Life Science Alliance policy that if requested, original data images must be made available to the editors. Failure to provide original images upon request will result in unavoidable delays in publication. Please ensure that you have access to all original data images prior to final submission.\*\***

**\*\*The license to publish form must be signed before your manuscript can be sent to production. A link to the electronic license to publish form will be sent to the corresponding author only. Please take a moment to check your funder requirements.\*\***

**\*\*Reviews, decision letters, and point-by-point responses associated with peer-review at Life Science Alliance will be published online, alongside the manuscript. If you do want to opt out of having the reviewer reports and your point-by-point responses displayed, please let us know immediately.\*\***

Thank you for your attention to these final processing requirements. Please revise and format the manuscript and upload materials within 7 days.

Thank you for this interesting contribution, we look forward to publishing your paper in Life Science Alliance.

Sincerely,

Novella Guidi, PhD  
Scientific Editor

---

Reviewer #1 (Comments to the Authors (Required)):

The authors have removed a large part of the data to present a clear message of the paper avoiding exaggerated interpretation of the obtained results. I strongly feel that the paper is now well-organized in comparison with the previous version. Thus I will support the acceptance of the paper in its current form in LSA.

September 15, 2021

RE: Life Science Alliance Manuscript #LSA-2021-01151-TRR

Dr. Saadi Khochbin  
Inserm U1209  
INSERM U1209, University Grenoble Alpes  
Domaine de la Merci  
La Tronche 38706 cedex  
France

Dear Dr. Khochbin,

Thank you for submitting your Research Article entitled "ATAD2 controls chromatin-bound HIRA turnover". It is a pleasure to let you know that your manuscript is now accepted for publication in Life Science Alliance. Congratulations on this interesting work.

The final published version of your manuscript will be deposited by us to PubMed Central upon online publication.

Your manuscript will now progress through copyediting and proofing. It is journal policy that authors provide original data upon request.

Reviews, decision letters, and point-by-point responses associated with peer-review at Life Science Alliance will be published online, alongside the manuscript. If you do want to opt out of having the reviewer reports and your point-by-point responses displayed, please let us know immediately.

**\*\*\*IMPORTANT:** If you will be unreachable at any time, please provide us with the email address of an alternate author. Failure to respond to routine queries may lead to unavoidable delays in publication.**\*\*\***

Scheduling details will be available from our production department. You will receive proofs shortly before the publication date. Only essential corrections can be made at the proof stage so if there are any minor final changes you wish to make to the manuscript, please let the journal office know now.

#### DISTRIBUTION OF MATERIALS:

Authors are required to distribute freely any materials used in experiments published in Life Science Alliance. Authors are encouraged to deposit materials used in their studies to the appropriate repositories for distribution to researchers.

You can contact the journal office with any questions, contact [contact@life-science-alliance.org](mailto:contact@life-science-alliance.org)

Again, congratulations on a very nice paper. I hope you found the review process to be constructive and are pleased with how the manuscript was handled editorially. We look forward to future exciting submissions from your lab.

Sincerely,

Novella Guidi, PhD  
Scientific Editor  
Life Science Alliance
