# Supplementary material for: ATAD2 controls chromatin-bound HIRA turnover
Source: PubMed Central journal article supplement (PMC8500222; doi:10.26508/lsa.202101151), 2021-09-27
Supplement: LSA-2021-01151_SdataF3.pdf [file LSA-2021-01151_SdataF3.pdf]

# Raw data Western blots Figure 3A

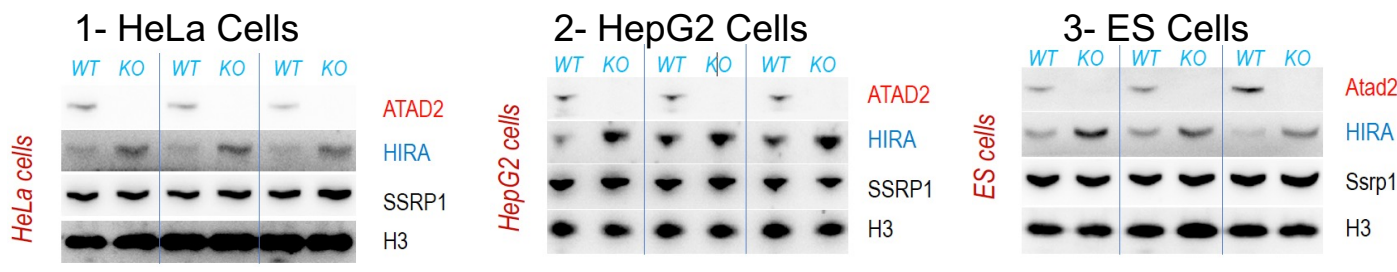

## 1- HeLa Cells

### Membranes

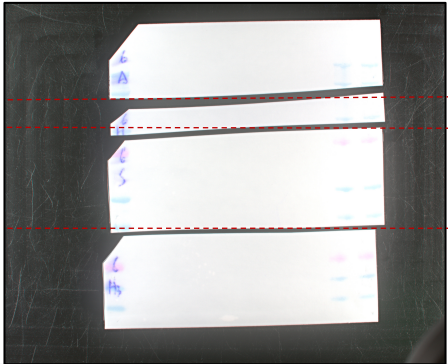

### Low exposure

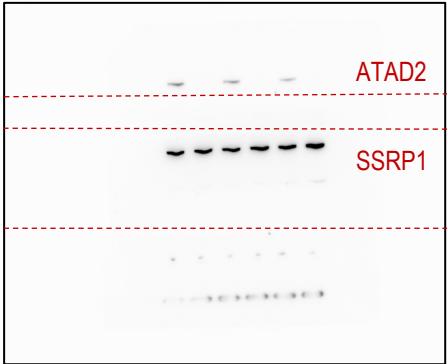

### Higher exposure

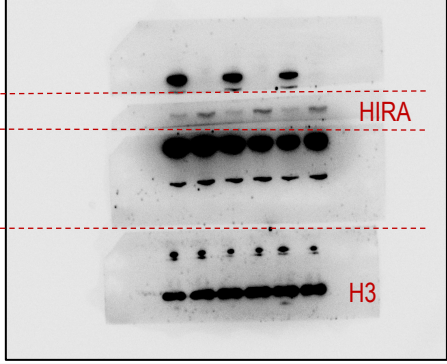

## 2- HepG2 Cells

### Membranes

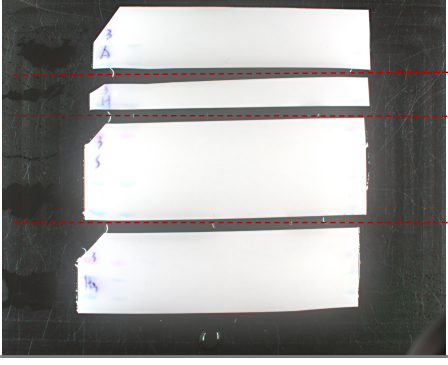

### Low exposure

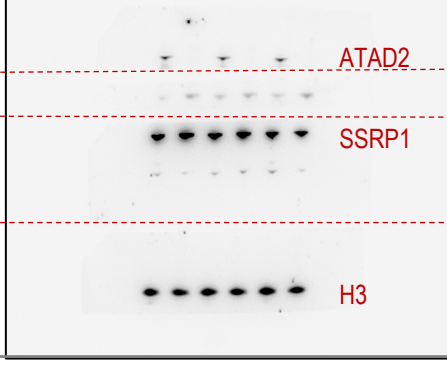

### Higher exposure

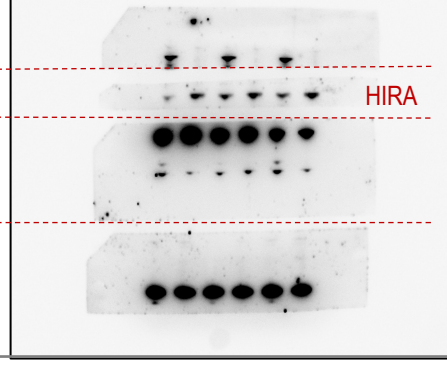

## 3- ES Cells

### Membranes

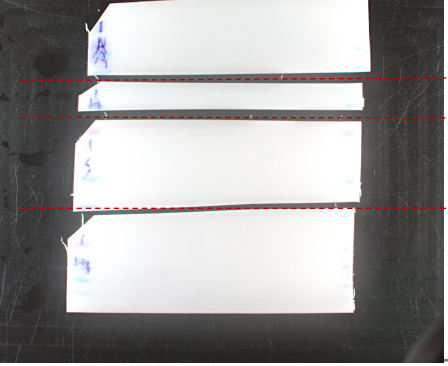

### Low exposure

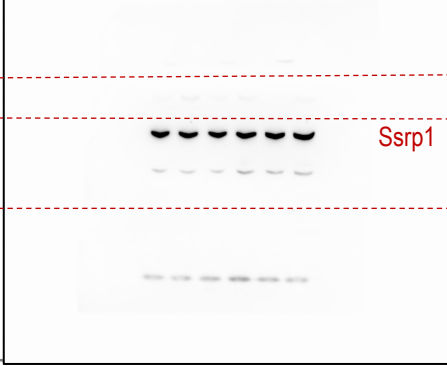

### Higher exposure

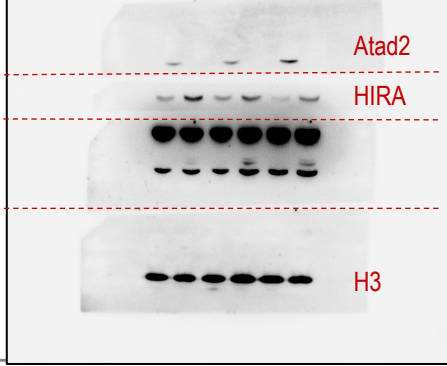

After SDS-PAGE, the blot was cut as shown and each strip was probed with the indicated antibodies. After revelation, low and high exposures were performed as indicated. The final Figure was made by choosing the appropriate exposure for each antibody. The exposures chosen for the final Figure are those labelled by the name of the antibody used.
