# Supplementary material for: ATAD2 controls chromatin-bound HIRA turnover
Source: Life Sci Alliance. 2021 Sep 27;4(12):e202101151. doi: 10.26508/lsa.202101151 (PMC8500222; doi:10.26508/lsa.202101151)
Supplement: Supplementary file 5 [file LSA-2021-01151_TableS4.xlsx]

## Sheet: Table S4
Table S4. Genotypes of S. pombe strains
Variant name	Genotype
SVP 8	h+ , leu1-32 , ori1 , ade 6-216 , ura4-D18 , Imr :: ura4+
SVP 3789, 3790	h+ , leu1-32 , ori1 , ade 6-216 , ura4-D18 , Imr :: ura4+ , abo1∆ :: nat
abo1∆_supA	h+ , leu1-32 , ori1 , ade 6-216 , ura4-D18 , Imr :: ura4+ , abo1∆ :: nat , hip3 R1303stop
abo1∆_supB	h+ , leu1-32 , ori1 , ade 6-216 , ura4-D18 , Imr :: ura4+ , abo1∆ :: nat , hip3 Q643stop
abo1∆_supC	h+ , leu1-32 , ori1 , ade 6-216 , ura4-D18 , Imr :: ura4+ , abo1∆ :: nat , hip3 L914stop
abo1∆_supD	h+ , leu1-32 , ori1 , ade 6-216 , ura4-D18 , Imr :: ura4+ , abo1∆ :: nat , hip3 K581stop
abo1∆_supE	h+ , leu1-32 , ori1 , ade 6-216 , ura4-D18 , Imr :: ura4+ , abo1∆ :: nat , hip3 C808stop
abo1∆_supF	h+ , leu1-32 , ori1 , ade 6-216 , ura4-D18 , Imr :: ura4+ , abo1∆ :: nat , hip3 N74fs
abo1∆_supG	h+ , leu1-32 , ori1 , ade 6-216 , ura4-D18 , Imr :: ura4+ , abo1∆ :: nat , slm9 G307A
abo1∆_supH	h+ , leu1-32 , ori1 , ade 6-216 , ura4-D18 , Imr :: ura4+ , abo1∆ :: nat , slm9 Q640stop
abo1∆_supI	h+ , leu1-32 , ori1 , ade 6-216 , ura4-D18 , Imr :: ura4+ , abo1∆ :: nat , pcf1 I213fs
abo1∆_supJ	h+ , leu1-32 , ori1 , ade 6-216 , ura4-D18 , Imr :: ura4+ , abo1∆ :: nat , hht2 L83S
abo1∆_supK	h+ , leu1-32 , ori1 , ade 6-216 , ura4-D18 , Imr :: ura4+ , abo1∆ :: nat , hhf1 T55P
SPV 4451	h- , ura4-D18 , ade6 :: ade6+ :: Padh15 :: skp1 :: OsTIR1 :: Nat MX6 :: Padh15 :: skp1 :: AtTIR1 :: 2NLS
SPV 4530, 4531, 4532	h- , ura4-D18 , ade6 :: ade6+ :: Padh15 :: skp1 :: OsTIR1 :: nat MX6 :: Padh15 :: skp1 :: AtTIR1 :: 2NLS , abo1 :: 2HA :: iaa17 :: kan
SPV 4817, 4818, 4819	h- , ura4-D18 , ade6 :: ade6+ :: Padh15 :: skp1 :: OsTIR1 :: nat MX6 :: Padh15 :: skp1 :: AtTIR1 :: 2NLS , abo1 :: 2HA :: iaa17 :: kan , hht1∆ hhf1∆ :: hph
SPV 4822, 4823, 4824	h- , ura4-D18 , ade6 :: ade6+ :: Padh15 :: skp1 :: OsTIR1 :: nat MX6 :: Padh15 :: skp1 :: AtTIR1 :: 2NLS , abo1 :: 2HA :: iaa17 :: kan , hht2∆ hhf2∆ :: hph
