# Supplementary material for: ATAD2 controls chromatin-bound HIRA turnover
Source: Life Sci Alliance. 2021 Sep 27;4(12):e202101151. doi: 10.26508/lsa.202101151 (PMC8500222; doi:10.26508/lsa.202101151)
Supplement: Supplementary file 6 [file LSA-2021-01151_TableS5.xlsx]

## Sheet: Table S5
Table S5. Primers sequences used for S. pombe genotyping
Gene	Primer name	Sequence
hip3 (cds)	hip3_supA_F	AGCATGCCGTAAATGTGGTG
	hip3_supA_R	CTCCATGATTTTAGCAATGCGA
	hip3_supC_F2	CTTTGATGAGTGGTTGGTGCA
	hip3_supC_R2	GGAACATAGTACTCGCTGCC
slm9 (cds)	slm9_supH_F	TTGTAGCTGCAACTCCTTGT
	slm9_supH_R	TTCCAAGTCTAGTTTTGCAGAAC
SPCC622.11 (cds)	LMBR_F	TGGTTTTGTGTATGTCCCGG
	LMBR_R	GAAGTGGCAGACGAATTGGT
esf1 (5’UTR)	esf1_F	TCCTCAAAGCATAGAAGAATCGA
	esf1_R	CCTTGAGAGATTTAAACCGCTCA
pcs60 (cds)	pcs60_F	GCTGTTCGTGCTGCTAAGAA
	pcs60_R	GGGACCGCAGTATACCAAGT
